# Supplementary material for: Exploring exchange processes in proteins by paramagnetic perturbation of NMR spectra
Source: Royal Society of Chemistry journal article supplement (doi:10.1039/c9cp06950j), 2020-01-01
Supplement: c9cp06950j1.pdf [file c9cp06950j1.pdf]

## Exploring exchange processes in proteins by paramagnetic perturbation of NMR spectra

Yamanappa Hunashal<sup>a,b</sup>, Cristina Cantarutti<sup>c</sup>, Sofia Giorgetti<sup>d</sup>, Loredana Marchese<sup>d</sup>, Henriette Molinari<sup>e</sup>, Neri Nicolaif,  
Federico Fogolari<sup>g,h</sup>, Gennaro Esposito<sup>a,h\*</sup>

<sup>a</sup> Science Division, New York University Abu Dhabi, Abu Dhabi – UAE.

<sup>b</sup> DAME, Università di Udine, 33100 Udine, Italy.

<sup>c</sup> Institute of Chemistry, UMR CNRS 7272, Université Côte d'Azur, University of Nice Sophia Antipolis, Parc Valrose, 06108, Nice Cedex 2, France.

<sup>d</sup> Dipartimento di Medicina Molecolare, Università di Pavia, Via Taramelli 3, 27100 Pavia, Italy.

<sup>e</sup> Istituto di Scienze e Tecnologie Chimiche (SCITEC), CNR, Via A. Corti, 12, 20133, Milano, Italy. <sup>f</sup> Dipartimento di Biotecnologie, Chimica e Farmacia, Università di Siena, Via Moro 2, 53100 Siena, Italy. <sup>g</sup> DMIF, Università di Udine, 33100 Udine, Italy.

<sup>h</sup> INBB, Viale Medaglie d'Oro 305, 00136 Roma, Italy.

\*Corresponding author

[rino.esposito@nyu.edu](mailto:rino.esposito@nyu.edu) (Gennaro Esposito)

ELECTRONIC SUPPLEMENTARY INFORMATION

**Figure S1:** Overlay of the  $A_N$  values obtained from  $^1\text{H}$ - $^{15}\text{N}$  HSQC spectra of 0.32 mM  $\beta$ 2m in the presence of 1.6 mM Tempol at 298 K, with relaxation delay of 0.2 s (green), 0.5 s (blue) and 4 s (red). The  $\beta$ -strand location and naming along the sequence is reported with yellow strips.

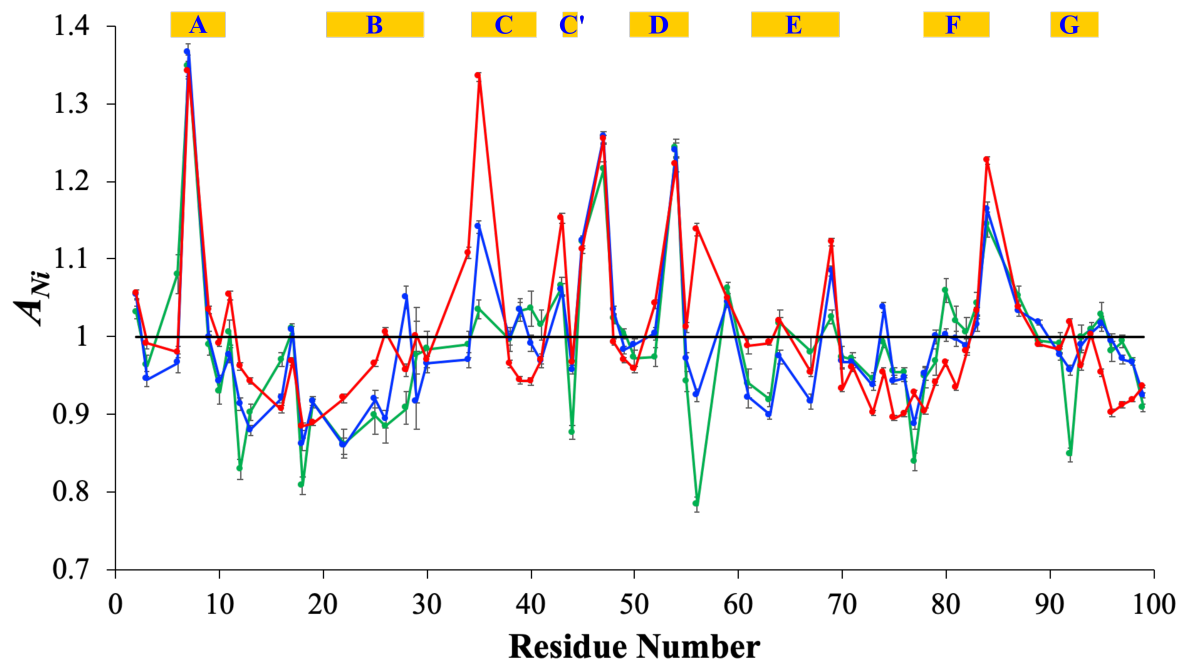

**Figure S2:** (A) Amide hydrogen chemical shifts of a selected group of  $\beta 2m$  residues measured as a function of the Tempol/protein concentration ratio (R). (B) Overlay of ESR spectra of Tempol (blue) and Tempol:  $\beta 2m$ , 1:1 (red) and Tempol:  $\beta 2m$ , 1:5 (green).

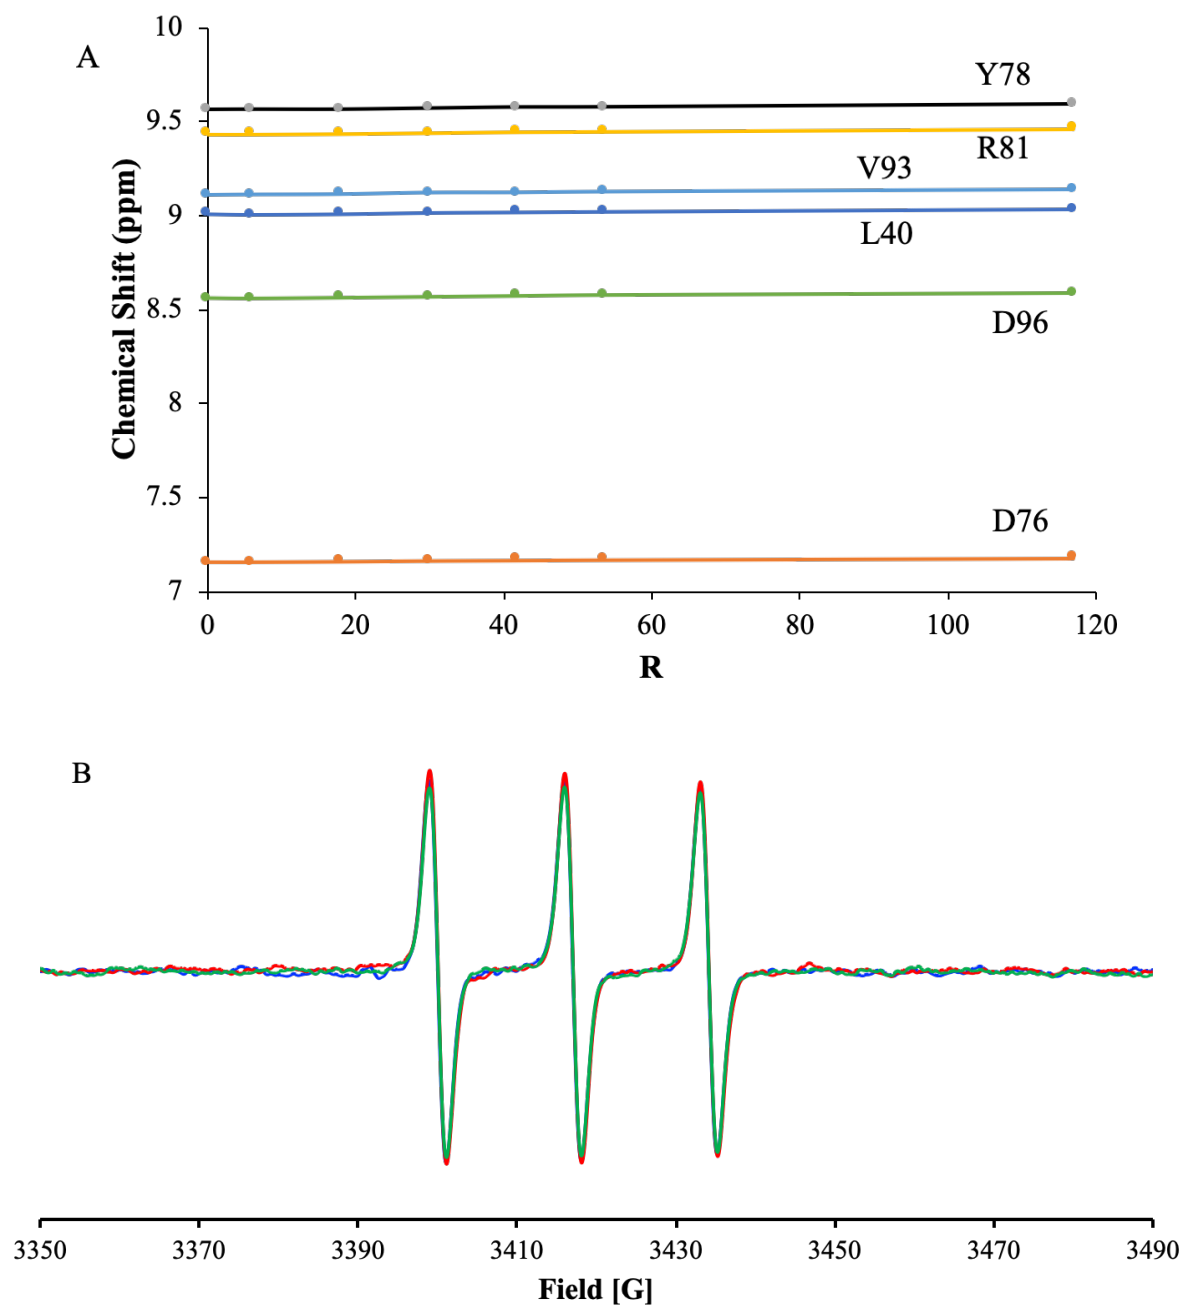

**Figure S3:** Relative intensity of individual backbone NH signals from HSQC spectra measured for 0.32 mM  $\beta$ m samples, with and without 1.6 mM Tempol, at different temperatures and relaxation delays (D1): (A) D1= 0.5 s at 298 K; (B) D1= 4 s at 298 K; (C) D1=0.5 s at 310 K; (D) D1=5 s at 310 K. The red and green lines represent the average relative intensity and the displacement by one standard deviation, respectively.

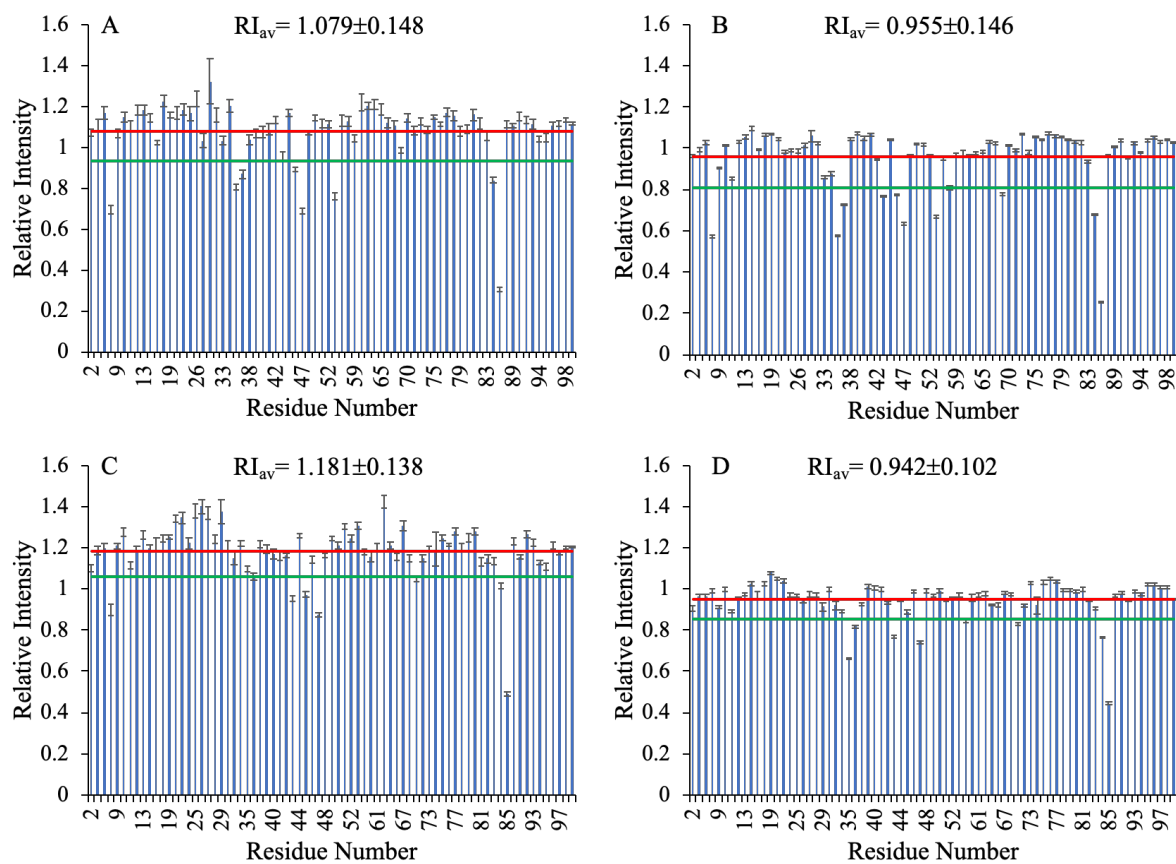

**Figure S4:** Relative intensity of individual backbone NH signals from HSQC spectra measured for 50  $\mu\text{M}$   $\beta\text{2m}$  samples, with and without 250  $\mu\text{M}$  Tempol, at 298 K and different relaxation delays (D1): (A) D1= 0.5 s; (B) D1= 4 s. The red and green lines represent the average relative intensity and the displacement by one standard deviation, respectively.

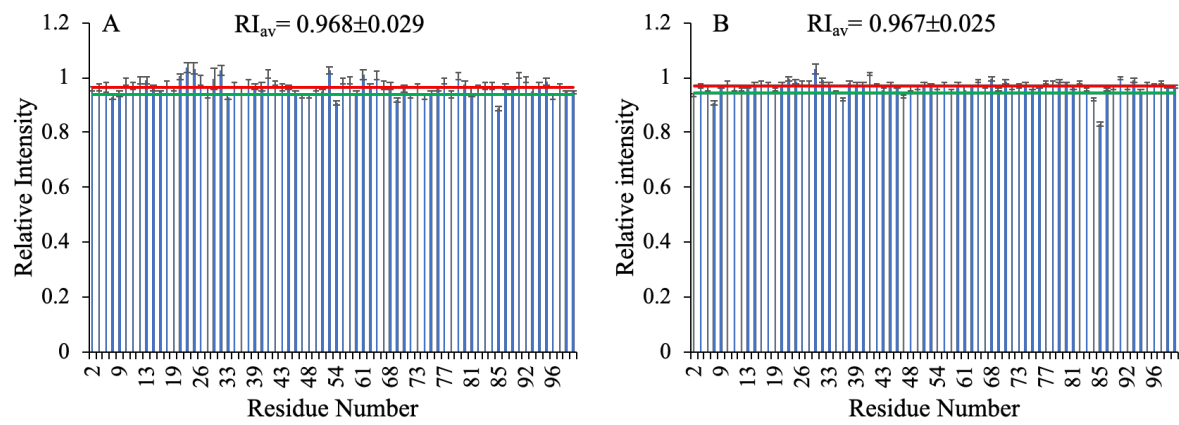

**Figure S5:** (A) Average depth from surface of  $\beta_2m$  amide hydrogens throughout 100 ns MD simulation<sup>a</sup>. (B) Experimental  $A_N$  [eq] values against computed average depth of  $\beta_2m$  amide hydrogens. The correlation has a  $p$  value of  $4.5 \times 10^{-4}$  and is therefore statistically meaningful.

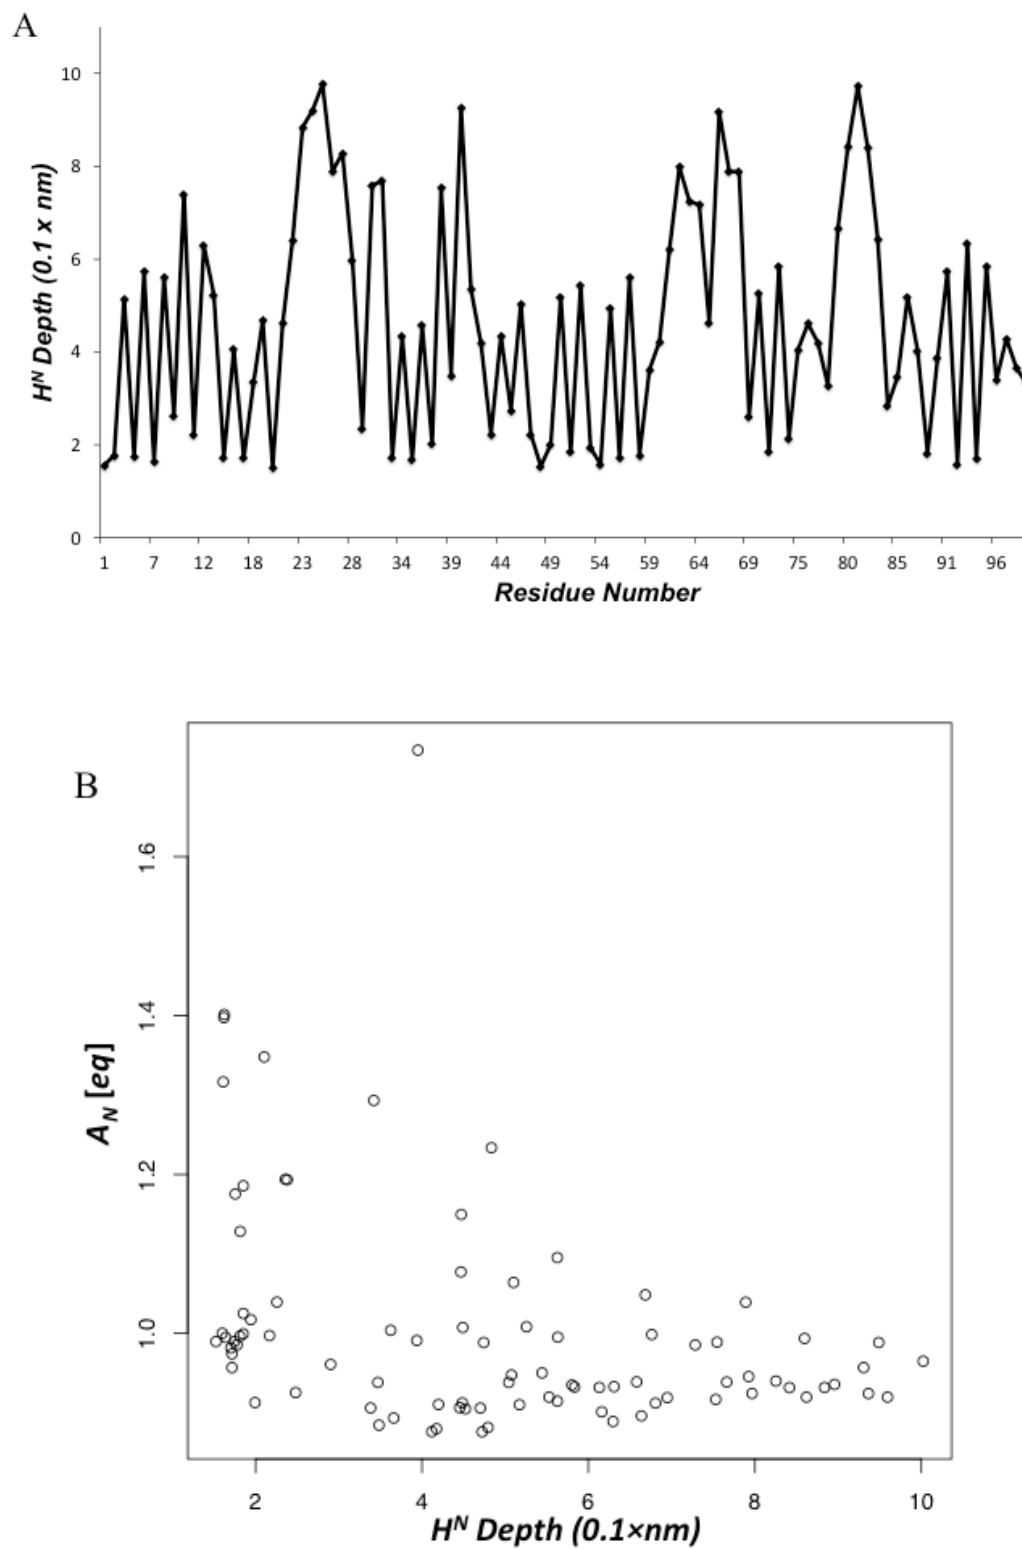

<sup>a</sup>The coordinates of  $\beta 2m$  were obtained from the structure of human class I major histocompatibility complex (PDB code: 3HLA)<sup>1</sup>. The protonation states of titratable groups were assigned using the Bluues server available at the URL <http://protein.bio.unipd.it/bluues/><sup>2,3</sup>. For TEMPOL the structure was built using, as a starting template, the structure of the spin label reported by Sezer et al.<sup>4</sup>, then adapting the parameters from CHARMM forcefield with the charges assigned using the algorithm of Gasteiger and Marsili<sup>5</sup>. Molecular dynamics simulations were carried out with the program NAMD 2.9<sup>6</sup> using the Generalized Born Surface Area (GBSA) implicit solvent model<sup>7</sup> employing the Onufriev-Bashford-Case (OBC) model<sup>8</sup>. A high concentration box with 26 TEMPOL molecules arranged on a cubic grid surrounding a protein molecule was simulated imposing elastic spherical boundary conditions<sup>9</sup>. Four 5 ns simulations were conducted at 298 K and 310 K. Reference explicit solvent simulations were performed for 110 ns at 298 K and 310 K essentially as previously described<sup>10</sup>. Analysis was performed on the last 100 ns. The depth of amide protons was obtained as the generalized Born radius computed according to the GBR6 model<sup>1,11</sup>. The molecular surface was generated using the program MSMS<sup>12</sup> and the GBR6 was computed using the program Bluues<sup>1</sup>. For all the exposed locations listed in Table 1 of main text, the corresponding amide hydrogens possess average distances from the surface between 0.18 and 0.49 nm. A qualitative correlation also emerges between the extent of attenuation and the depth figure, i.e. the larger the depth, the lower the attenuation.

**Figure S6:** (A) NMR experiment carried out on HOD, in the absence and presence of Tempol, to highlight the enhanced recovery of the off-equilibrium magnetization<sup>a</sup>. Below the  $^1\text{H}$  pulse line, the G line indicates the magnetic gradient pulse timing. (B) HOD signal intensity as a function of the B (magnetic field induction) gradient strength obtained with the sequence sketched in panel A, in the absence (black) and in the presence of 10 mM (blue) or 100 mM (red) Tempol. Each series of values was normalized to the respective value obtained at zero B gradient. (C) Same as in panel B, but with double normalization for the data acquired in presence of Tempol, namely with an additional initial scaling with respect to the corresponding intensities sampled in the absence of Tempol, prior to applying the zero-gradient-value normalization within each series.

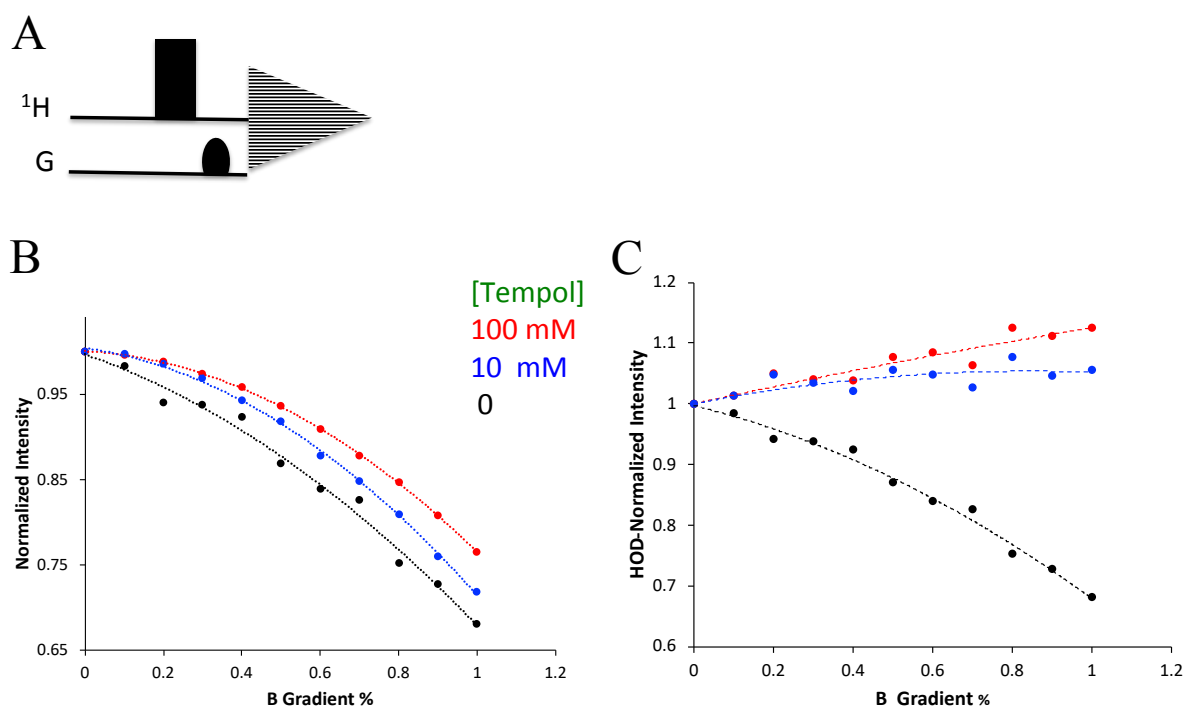

<sup>a</sup>The experiments were acquired at 600 MHz and 298 K with 1%  $\text{H}_2\text{O}$  in  $\text{D}_2\text{O}$  samples at varying Tempol concentrations (0, 10, 100 mM), by collecting 16 scans preceded by 64 dummy scans with a relaxation delay ( $D_1$ ) of 0.2 s. A magnetic field gradient along the z-direction was applied with a 100  $\mu\text{s}$  pulse of differing strengths, i.e. 0-1% with respect to the maximum of 67 Gauss/cm. To demonstrate the Tempol-induced enhancement of the signal acquired with short relaxation delay, the sequence included a small field gradient between the pulse and the acquisition. The gradient should represent the dephasing contributed by slow or intermediate exchange processes. Expectedly, if the experiment is done comparing pure HOD and Tempol-doped HOD as a function of the gradient strength, a larger recovery should be obtained from doped HOD because of the effect of  $R_{1\rho}$ . The effect should increase on increasing the gradient. The results confirm the expectations.



**Figure S7:** Fitting (blue curve) of 0.36 mM  $\beta$ m relaxation dispersion data. The plots report the transverse relaxation rate ( $s^{-1}$ ) as a function of the  $180^\circ$  pulse spacing ( $s^{-1}$ ). (A) 298 K; (B) 310 K. The experimental data points (red circles) are reported with the corresponding error bars.

A

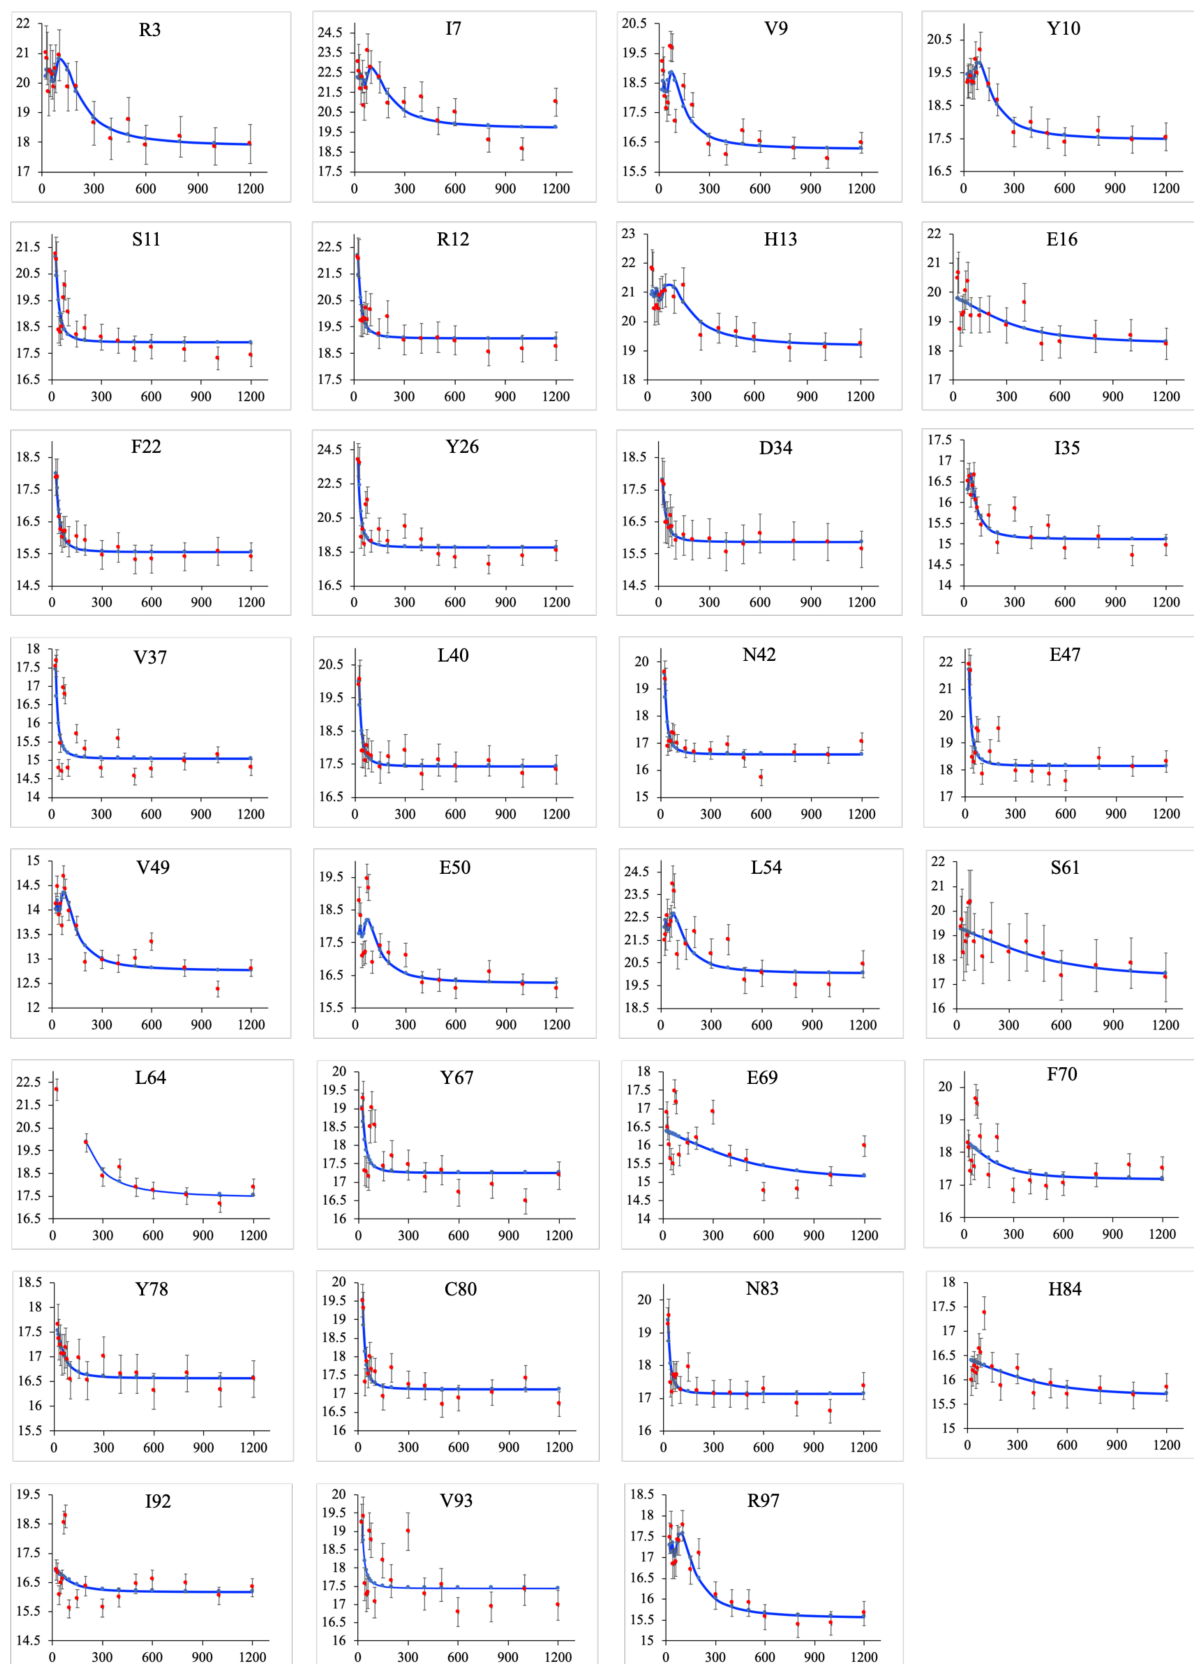

B

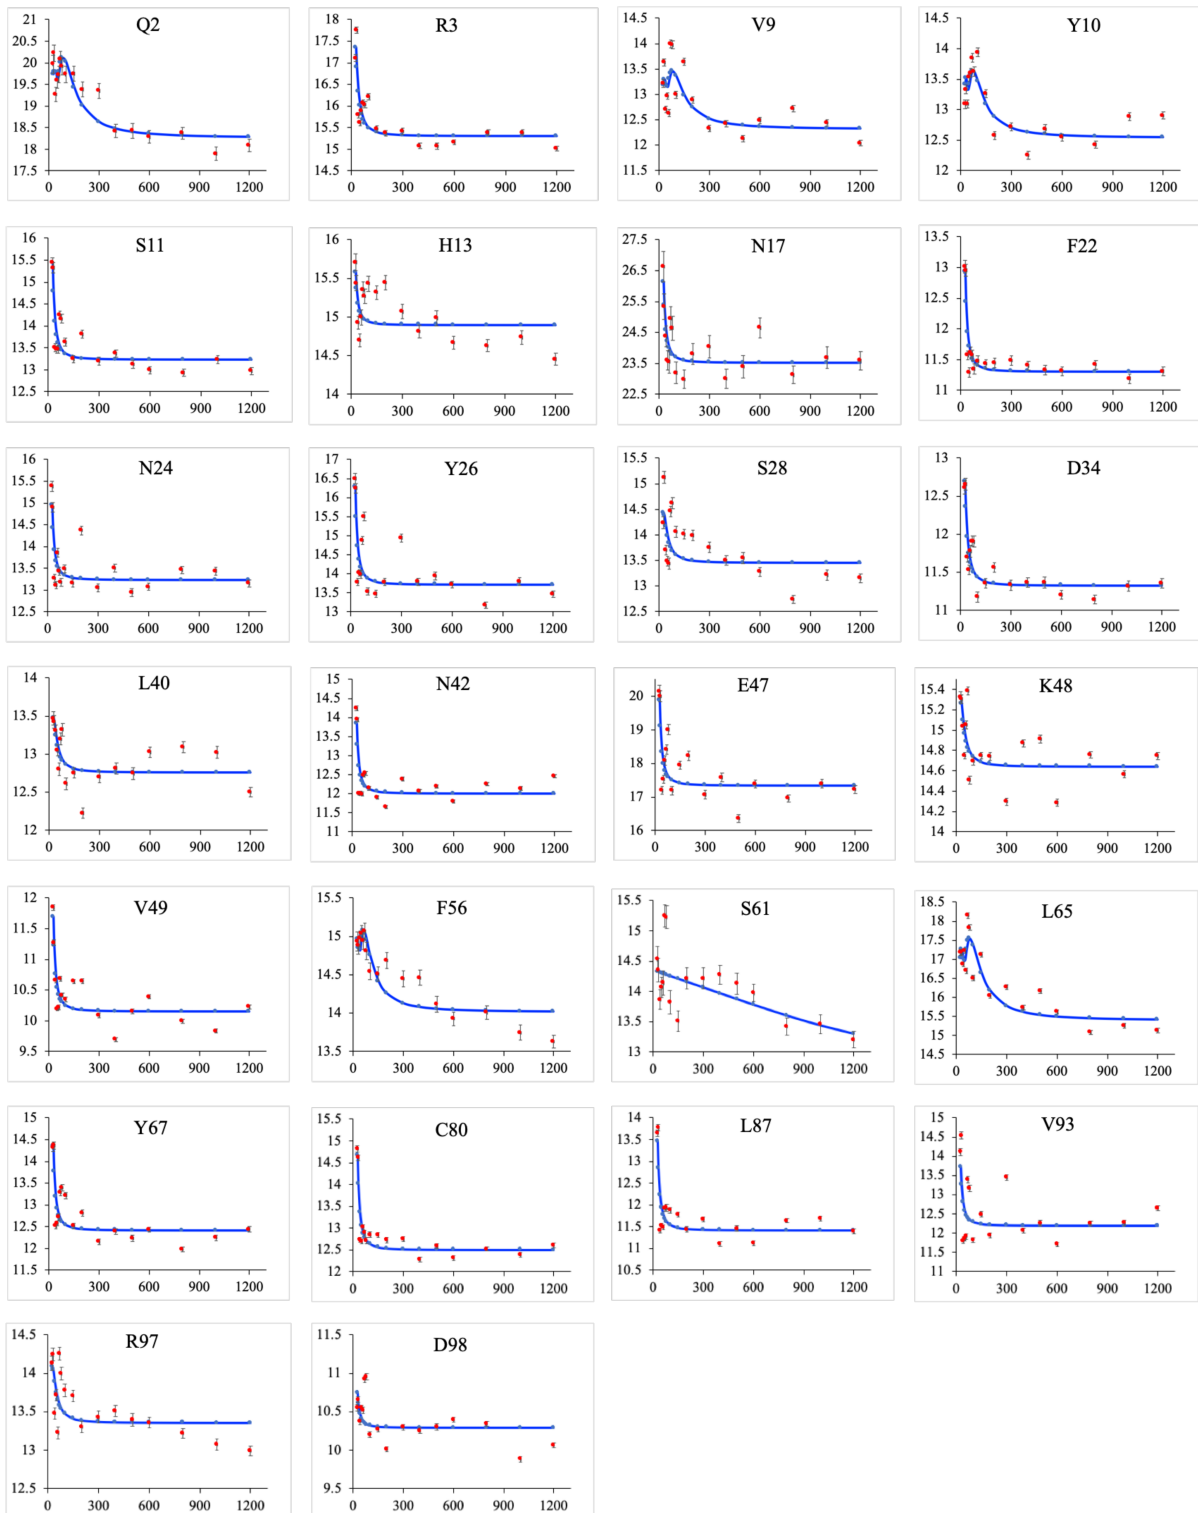

**Table S1:** Parameters for the fitting of the curves reported in Figure S7 as obtained from the dedicated routine of Dynamics Center software package (Bruker)<sup>a</sup>. The values of  $\chi^2$  (Pearson's  $\chi^2$  test statistic) and the related probability density function are reported for each fitted data set.

| <b>298K</b> |                  |       |                   |       |          |           |
|-------------|------------------|-------|-------------------|-------|----------|-----------|
| Name        | $R_2^0$<br>[1/s] | Error | $k_{ex}$<br>[1/s] | Error | $\chi^2$ | p-density |
| R3          | 17.86            | 0.79  | 2.46              | 1.18  | 1.13E-01 | 1.72E-13  |
| I7          | 19.66            | 0.77  | 2.55              | 0.87  | 4.44E-01 | 2.10E-09  |
| V9          | 16.26            | 0.28  | 2.13              | 0.40  | 3.80E-01 | 7.35E-10  |
| Y10         | 17.46            | 0.40  | 1.95              | 0.54  | 3.66E-02 | 6.68E-17  |
| S11         | 17.93            | 0.28  | 117               | 14    | 4.29E-01 | 1.68E-09  |
| R12         | 19.06            | 0.32  | 112               | 16    | 1.72E-01 | 3.12E-12  |
| H13         | 19.15            | 0.68  | 1.81              | 0.99  | 1.39E-01 | 7.42E-13  |
| E16         | 18.23            | 0.38  | 2066              | 11    | 2.35E-01 | 2.76E-11  |
| F22         | 15.55            | 0.29  | 2.4               | 11.6  | 4.53E-02 | 4.08E-16  |
| Y26         | 18.78            | 0.36  | 38.0              | 5.7   | 8.79E-01 | 2.02E-07  |
| D34         | 15.87            | 0.35  | 129               | 30    | 4.53E-02 | 2.99E-16  |
| I35         | 15.12            | 0.18  | 1.27              | 0.31  | 9.04E-02 | 3.67E-14  |
| V37         | 15.05            | 0.14  | 22.0              | 27.4  | 5.86E-01 | 1.36E-08  |
| L40         | 17.44            | 0.27  | 46.8              | 26.9  | 9.2 E-02 | 4.15E-14  |
| N42         | 16.6             | 0.19  | 25.8              | 22.2  | 1.67E-01 | 2.57E-12  |
| E47         | 18.17            | 0.23  | 27.4              | 25.2  | 3.97E-01 | 9.83E-10  |
| V49         | 12.76            | 0.14  | 1.32              | 0.20  | 8.53E-02 | 2.43E-14  |
| E50         | 16.26            | 0.27  | 1.60              | 0.40  | 3.84E-01 | 7.84E-10  |
| L54         | 20.04            | 0.54  | 2.15              | 0.70  | 4.49E-01 | 2.30E-09  |
| S61         | 17.21            | 0.71  | 3032              | 29    | 3.09E-01 | 1.78E-10  |
| L64         | 17.43            | 0.42  | 4.94              | 1.63  | 4.28E-02 | 2.01E-16  |
| Y67         | 17.24            | 0.23  | 119               | 30    | 4.20E-01 | 1.44E-09  |
| E69         | 15.01            | 0.17  | 2907              | 4     | 4.10E-01 | 1.22E-09  |
| F70         | 17.17            | 0.25  | 1237              | 8     | 4.21E-01 | 1.49E-09  |
| Y78         | 16.56            | 0.23  | 324               | 24    | 3.36E-02 | 3.72E-17  |
| C80         | 17.12            | 0.21  | 51.0              | 27.2  | 1.23E-01 | 3.20E-13  |
| N83         | 17.14            | 0.23  | 41.2              | 29.4  | 1.40E-01 | 7.69E-13  |
| H84         | 15.64            | 0.20  | 2512              | 21    | 1.12E-01 | 1.58E-13  |

| <b>I92</b>  | 16.17            | 0.21  | 729              | 17    | 6.42E-01 | 2.53E-08  |
|-------------|------------------|-------|------------------|-------|----------|-----------|
| <b>V93</b>  | 17.44            | 0.26  | 6.4              | 22.0  | 4.89E-01 | 4.06E-09  |
| <b>R97</b>  | 15.54            | 0.28  | 1.68             | 0.38  | 8.27E-02 | 1.97E-14  |
| <b>310K</b> |                  |       |                  |       |          |           |
| Name        | $R_2^0$<br>[1/s] | Error | $k_{ex}$<br>1/s] | Error | $\chi^2$ | p-density |
| <b>Q2</b>   | 18.26            | 0.12  | 1.53             | 0.17  | 8.40E-02 | 2.20E-14  |
| <b>R3</b>   | 15.3             | 0.08  | 123              | 10    | 1.44E-01 | 9.18E-13  |
| <b>V9</b>   | 12.31            | 0.09  | 0.94             | 0.18  | 1.82E-01 | 4.69E-12  |
| <b>Y10</b>  | 12.53            | 0.11  | 0.91             | 0.24  | 7.78E-02 | 1.29E-14  |
| <b>S11</b>  | 13.22            | 0.05  | 29.7             | 25.7  | 1.79E-01 | 4.17E-12  |
| <b>H13</b>  | 14.9             | 0.05  | 4.4              | 31.5  | 1.02E-01 | 8.51E-14  |
| <b>N17</b>  | 23.52            | 0.20  | 45.7             | 25.1  | 2.29E-01 | 2.29E-11  |
| <b>F22</b>  | 11.31            | 0.04  | 16.2             | 30.0  | 5.80E-02 | 1.66E-15  |
| <b>N24</b>  | 13.23            | 0.05  | 24.8             | 17.0  | 2.12E-01 | 1.32E-11  |
| <b>Y26</b>  | 13.72            | 0.06  | 21.4             | 23.0  | 4.79E-01 | 3.55E-09  |
| <b>S28</b>  | 13.45            | 0.05  | 0.80             | 0.33  | 2.93E-01 | 1.25E-10  |
| <b>D34</b>  | 11.33            | 0.04  | 1.91             | 6.68  | 5.88E-02 | 1.83E-15  |
| <b>L40</b>  | 12.75            | 0.05  | 0.59             | 0.25  | 7.65E-02 | 1.15E-14  |
| <b>N42</b>  | 12.01            | 0.03  | 14.7             | 25.7  | 1.82E-01 | 4.76E-12  |
| <b>E47</b>  | 17.33            | 0.07  | 17.0             | 15.0  | 4.15E-01 | 1.34E-09  |
| <b>K48</b>  | 14.64            | 0.05  | 0.57             | 0.38  | 6.02E-02 | 2.15E-15  |
| <b>V49</b>  | 10.15            | 0.02  | 23.6             | 18.6  | 1.13E-01 | 1.70E-13  |
| <b>F56</b>  | 14.02            | 0.15  | 0.87             | 0.39  | 5.57E-02 | 1.25E-15  |
| <b>S61</b>  | 12.57            | 0.10  | 7522             | 1     | 2.18E-01 | 1.62E-11  |
| <b>L65</b>  | 15.4             | 0.08  | 1.77             | 0.13  | 1.72E-01 | 3.11E-12  |
| <b>Y67</b>  | 12.42            | 0.03  | 28.6             | 26.5  | 2.21E-01 | 1.79E-11  |
| <b>C80</b>  | 12.5             | 0.03  | 17.8             | 24.1  | 9.37E-02 | 4.70E-14  |
| <b>L87</b>  | 11.42            | 0.03  | 17.6             | 23.4  | 2.08E-01 | 1.18E-11  |
| <b>V93</b>  | 12.19            | 0.04  | 21.4             | 20.1  | 6.11E-01 | 1.81E-08  |
| <b>R97</b>  | 13.36            | 0.04  | 0.60             | 0.24  | 1.11E-01 | 1.49E-13  |
| <b>D98</b>  | 10.29            | 0.02  | 35.9             | 40.6  | 1.09E-01 | 1.38E-13  |

<sup>a</sup>The routine employed by Dynamics Center models the experimental data with the best fitting out of three different functions, depending on whether the dispersion curve is flat (independent on the effective field), or modulated by slow or fast exchange rate. In the slow exchange limit, the fitting function is<sup>13</sup>:

$$R_2(\tau_{CP}) = R_2^0 + k_{ex} - k_{ex} \frac{\sin(\Delta\omega\tau_{CP})}{\Delta\omega\tau_{CP}}$$

where  $R_2(\tau_{CP})$  is the transverse relaxation rate determined as a function of time between the CPMG 180° pulses,  $\tau_{CP}$ ,  $R_2^0$  is the transverse relaxation rate without exchange contribution,  $k_{ex}$  is the exchange rate constant,  $\Delta\omega$  is the chemical shift difference between the two exchanging states. The other function used by Dynamics Center to fit relaxation dispersion data refers to the fast exchange limit<sup>14</sup>:

$$R_2(\tau_{CP}) = R_2^0 + \frac{\Phi_{ex}}{k_{ex}} \left[ 1 - \frac{2 \tanh\left(\frac{k_{ex}\tau_{CP}}{2}\right)}{k_{ex}\tau_{CP}} \right]; \quad \Phi_{ex} = p_A p_B \Delta\omega^2$$

where  $p_A$  and  $p_B$  are the fractional populations of the two exchanging states.

**Table S2:** Selected  $^{15}\text{N}$  NMR  $T_{1\rho}$  values at different spin-lock field strengths of 0.32 mM  $\beta_2\text{m}$  measured at 60.82 MHz ( $^{15}\text{N}$  frequency) and 298 K<sup>a</sup>.

| Residue | $T_{1\rho}$ [ms]<br>SL=3.00 kHz | $T_{1\rho}$ [ms]<br>SL=1.67 kHz |
|---------|---------------------------------|---------------------------------|
| Q2      | 94±5                            | 84±3                            |
| I7      | 91±5                            | 83±3                            |
| H13     | 76±2                            | 64±3                            |
| F22     | 91±3                            | 74±3                            |
| Y26     | 86±4                            | 75±6                            |
| G29     | 95±19                           | 82±23                           |
| D34     | 78±10                           | 65±2                            |
| E36     | 96±7                            | 88±5                            |
| L40     | 85±2                            | 76±2                            |
| N42     | 95±7                            | 90±3                            |
| K48     | 87±3                            | 75±3                            |
| S55     | 74±4                            | 53±5                            |
| F56     | 80±3                            | 59±3                            |
| D59     | 68±1                            | 53±5                            |
| S61     | 90±5                            | 85±10                           |
| L64     | 84±5                            | 65±11                           |
| E69     | 95±8                            | 83±4                            |
| C80     | 86±3                            | 73±5                            |
| L87     | 81±2                            | 79±2                            |
| V93     | 94±9                            | 81±3                            |
| K94     | 90±5                            | 85±8                            |
| D96     | 87±6                            | 84±7                            |
| R97     | 96±5                            | 90±5                            |
| D98     | 119±5                           | 94±5                            |

<sup>a</sup>  $T_{1\rho}$  measurements were performed with the sequence of Daye and Wagner<sup>16</sup> using spin-lock field strengths (SL) of 3.00 and 1.67 kHz and 20 spin-lock intervals ranging between 0 and 160 ms, with 3 repetitions at short, medium and large intervals for error estimation. The HSQC detection was performed with quadrature in F1 obtained by Echo/Antiecho-TPPI, gradient coherence selection and flip-back pulse for solvent suppression<sup>17-19</sup>. In all measurements, an interscan relaxation delay of 3 s was allowed. The number of scans for each collected relaxation interval was 32. The experiments were acquired in the pseudo3d mode and processed with the Bruker Dynamics Center software. Offset corrections<sup>15</sup> were applied.

## References

- 1 L. Strominger, D. C. Wiley, P. J. Bjorkman, M. A. Saper, B. Samraoui and W. S. Bennett, Structure of the human class I histocompatibility antigen, HLA-A2, *Nature*, 1987, **329**, 506–512.
- 2 F. Fogolari, A. Corazza, V. Yarra, A. Jalaru, P. Viglino and G. Esposito, Bluees: A program for the analysis of the electrostatic properties of proteins based on generalized Born radii, *BMC Bioinformatics*, 2012, **13**, S18.
- 3 I. Walsh, G. Minervini, A. Corazza, G. Esposito, S. C. E. Tosatto and F. Fogolari, Bluees server: Electrostatic properties of wild-type and mutated protein structures, *Bioinformatics*, 2012, **28**, 2189–2190.
- 4 D. Sezer, J. H. Freed and B. Roux, Parametrization, molecular dynamics simulation, and calculation of electron spin resonance spectra of a nitroxide spin label on a polyalanine  $\alpha$ -helix, *J. Phys. Chem. B*, 2008, **112**, 5755–5767.
- 5 J. Gasteiger and M. Marsili, Iterative partial equalization of orbital electronegativity—a rapid access to atomic charges, *Tetrahedron*, 1980, **36**, 3219–3228.
- 6 R. Skeel, M. Bhandarkar, R. Brunner, A. GURSOY, N. Krawetz, J. Phillips, A. Shinozaki, K. Varadarajan and K. Schulten, NAMD2: Greater Scalability for Parallel Molecular Dynamics, *J. Comput. Phys.*, 1999, **151**, 283–312.
- 7 D. Bashford and D. A. Case, Generalized born models of Macromolecular solvation effects, *Annu. Rev. Phys. Chem.*, 2000, **51**, 129–152.
- 8 A. Onufriev, D. Bashford and D. A. Case, Exploring Protein Native States and Large-Scale Conformational Changes with a Modified Generalized Born Model, *Proteins Struct. Funct. Genet.*, 2004, **55**, 383–394.
- 9 F. Fogolari, A. Corazza, S. Toppo, S. C. E. Tosatto, P. Viglino, F. Ursini and G. Esposito, Studying interactions by molecular dynamics simulations at high concentration, *J. Biomed. Biotechnol.*, 2012, **2012**, 1–9.
- 10 C. J. Dongmo Fomthum, A. Corazza, G. Esposito and F. Fogolari, Molecular dynamics simulations of  $\beta$ 2-microglobulin interaction with hydrophobic surfaces, *Mol. Biosyst.*, 2017, **13**, 2625–2637.
- 11 T. Grycuk, Deficiency of the Coulomb-field approximation in the generalized Born model: An improved formula for born radii evaluation, *J. Chem. Phys.*, 2003, **119**, 4817–4826.
- 12 M. F. Sanner, A. J. Olson and J. C. Spehner, Reduced surface: An efficient way to compute molecular surfaces, *Biopolymers*, 1996, **38**, 305–320.
- 13 M. Tollinger, N. R. Skrynnikov, F.A.A. Mulder, J.D. Forman-Kay and L.E. Kay, Slow Dynamics in Folded and Unfolded States of SH3 Domain, *J. Am. Chem. Soc.*, 2001, **123**, 11341–11352.
- 14 E.L. Kovrigin, J.G. Kemp, M.J. Grey and J.P. Loria, Faithful estimation of dynamics parameters from CPMG relaxation dispersion measurements, *J. Magn. Reson.*, 2006, **180**, 93–104.
- 15 A.G. Palmer III and H. Koss, Chemical Exchange, *Methods Enzymol.*, 2019, **615**, 177–236.
- 16 K.T. Dayie and G. Wagner, Relaxation Rate Measurements for  $^{15}\text{N}$ - $^1\text{H}$  Groups with Pulsed Field Gradients and Preservation of the Coherence Pathways, *J. Magn. Reson.*, 1994, **111**, 121–126.
- 17 A.G. Palmer, J. Cavanagh, P. E. Wright and M. Rance, Sensitivity improvement in proton-detected two-dimensional heteronuclear correlation NMR spectroscopy, *J. Magn. Reson.*, 1991, **93**, 151–170.
- 18 J. Schleucher, M. Schwendinger, M. Sattler, P. Schmidt, O. Schedletzky, S.J. Glaser, O.W. Sorensen and C. Griesinger, A general enhancement scheme in heteronuclear multidimensional NMR employing pulsed field gradients, *J. Biomol. NMR*, 1994, **4**, 301–306.
- 19 S. Grzesiek and A. Bax, The importance of not saturating water in protein NMR. Application to sensitivity enhancement and NOE measurements, *J. Am. Chem. Soc.*, 1993, **115**, 12593–12594.
